# Supplementary material
Source: PubMed Central journal article supplement (PMC2678914)
Supplement: NIHMS62764-supplement-1File002.pdf [file NIHMS62764-supplement-1File002.pdf]

## Supporting Information

Development of novel enkephalin analogues which have enhanced opioid activities at both  $\mu$  and  $\delta$  opioid receptors

Yeon Sun Lee,<sup>†</sup> Ravil Petrov,<sup>†</sup> Chad K. Park,<sup>†</sup> Shou-wu Ma,<sup>‡</sup> Peg Davis,<sup>‡</sup> Josephine Lai,<sup>‡</sup> Frank Porreca,<sup>‡</sup> Ruben Vardanyan,<sup>†</sup> Victor J. Hruby<sup>†\*</sup>

Departments of Chemistry, and Pharmacology, University of Arizona, Tucson, AZ, 85721, USA

**Table 1.** Analytical Data of Opioid Ligands

| no | molecular formula                                             | LowMS <sup>a</sup> |          | HRMS <sup>b</sup> |      | HPLC (t <sub>R</sub> , min) <sup>c</sup> |      |            | TLC (R <sub>f</sub> ) <sup>d</sup> |      |       |
|----|---------------------------------------------------------------|--------------------|----------|-------------------|------|------------------------------------------|------|------------|------------------------------------|------|-------|
|    |                                                               | observed           | observed | calcd.            | (A)  | purity (%)                               | (B)  | purity (%) | (I)                                | (II) | (III) |
| 8  | C <sub>23</sub> H <sub>29</sub> N <sub>2</sub> O <sub>3</sub> | 381.3              | 381.2184 | 381.2178          | 15.0 | 98                                       | 7.0  | 98         | 0.26                               | 0.63 | 0.65  |
| 10 | C <sub>36</sub> H <sub>46</sub> N <sub>6</sub> O <sub>5</sub> | 643.3              | 643.3613 | 643.3603          | 13.4 | 100                                      | 6.5  | 100        | 0.04                               | 0.66 | 0.70  |
| 11 | C <sub>46</sub> H <sub>57</sub> N <sub>8</sub> O <sub>7</sub> | 833.1              | 833.4390 | 833.4350          | 16.3 | 100                                      | 8.9  | 100        | 0.07                               | 0.65 | 0.70  |
| 12 | C <sub>40</sub> H <sub>52</sub> N <sub>8</sub> O <sub>7</sub> | 757.3              | 757.4039 | 757.4037          | 13.2 | 100                                      | 6.4  | 100        | 0.04                               | 0.66 | 0.70  |
| 13 | C <sub>28</sub> H <sub>37</sub> N <sub>5</sub> O <sub>5</sub> | 524.5              | 524.2873 | 524.2897          | 13.6 | 100                                      | 6.8  | 100        | 0.03                               | 0.71 | 0.61  |
| 14 | C <sub>37</sub> H <sub>46</sub> N <sub>6</sub> O <sub>6</sub> | 671.2              | 671.3579 | 671.3557          | 19.1 | 98                                       | 11.0 | 98         | 0.10                               | 0.42 | 0.49  |
| 15 | C <sub>30</sub> H <sub>41</sub> N <sub>5</sub> O <sub>5</sub> | 552.3              | 552.3165 | 552.3186          | 15.5 | 100                                      | 7.6  | 100        | 0.14                               | 0.63 | 0.63  |
| 16 | C <sub>39</sub> H <sub>50</sub> N <sub>6</sub> O <sub>6</sub> | 699.3              | 699.3852 | 699.3870          | 20.1 | 100                                      | 12.7 | 100        | 0.14                               | 0.76 | 0.71  |
| 17 | C <sub>41</sub> H <sub>52</sub> N <sub>8</sub> O <sub>8</sub> | 784.9              | 785.4011 | 785.3986          | 16.5 | 100                                      | 9.1  | 100        | 0.10                               | 0.77 | 0.64  |

<sup>a</sup>(M – TFA + H)<sup>+</sup>, ESI method [Finnigan, Thermoelectron, LCQ classic]. <sup>b</sup>(M – TFA + H)<sup>+</sup>, FAB-MS (JEOL HX110 sector instrument) or MALDI-TOF. <sup>c</sup>Performed on a Hewlett Packard 1100 [C-18, Microsorb-MV<sup>TM</sup>, 4.6 mm x 250 mm, 5  $\mu$ m]. (A) 10-90% of acetonitrile containing 0.1% TFA within 40 min and up to 100% within additional 5 min, 1 mL/min, (B) 25-65% of acetonitrile containing 0.1% TFA within 20 min and up to 100% within additional 5 min, 1 mL/min. <sup>d</sup>(I) CHCl<sub>3</sub>/MeOH/AcOH = 90:10:3, (II) EtOAc/BtOH/water/AcOH = 5:3:1:1, (III) BtOH/water/AcOH = 4:1:1.

**Table 2.** <sup>1</sup>H NMR Data of Opioid Ligands

| Compound | <sup>1</sup> H NMR (DMSO-d <sub>6</sub> )                                                                                                                                                                                                                                                                                                                                                                                                                                                                                                                                                                                                                                                                                                                                                                                                                                                                           |
|----------|---------------------------------------------------------------------------------------------------------------------------------------------------------------------------------------------------------------------------------------------------------------------------------------------------------------------------------------------------------------------------------------------------------------------------------------------------------------------------------------------------------------------------------------------------------------------------------------------------------------------------------------------------------------------------------------------------------------------------------------------------------------------------------------------------------------------------------------------------------------------------------------------------------------------|
| 8        | 1.15-1.20 (m, 2H), 1.66 (d, <i>J</i> = 11.4 Hz, 2H), 1.97-2.02 (m, 4H), 2.32 (t, <i>J</i> = 6.9 Hz, 2H), 2.42 (t, <i>J</i> = 8.1 Hz, 2H), 2.62 (t, <i>J</i> = 7.8 Hz, 2H), 2.90 (d, <i>J</i> = 11.4 Hz, 2H), 4.40 ( <i>J</i> = 12 Hz, 1H), 7.14 (m, 3H), 7.21 (m, 4H), 7.42 (t, <i>J</i> = 7.2 Hz, 1 H), 7.47 (t, <i>J</i> = 7.5 Hz, 2H), 8.04 (s, 4H), 8.12-8.14 (m,3H), 8.19 (d, <i>J</i> = 8.4 Hz, 1H), 8.48 (d, <i>J</i> = 7.2 Hz, 1H)                                                                                                                                                                                                                                                                                                                                                                                                                                                                          |
| 10       | 1.06 (t, <i>J</i> = 6.6 Hz, 3H), 1.43-1.48 (m, 1H), 1.59-1.63 (m, 1H), 1.79(m, 1H), 1.92 (m, 1H), 2.77-3.03 (m, 8H), 3.24 (m, 2H), 3.52-3.56 (m, 2H), 3.62 (dd, <i>J</i> <sub>1</sub> = 15.6 Hz, <i>J</i> <sub>2</sub> = 4.2 Hz, 1H), 3.71-3.75 (m, 2H), 3.98 (d, <i>J</i> = 4.8 Hz, 1H), 4.32 (dd, <i>J</i> <sub>1</sub> = 13.8 Hz, <i>J</i> <sub>2</sub> = 6.6 Hz, 1H), 4.46 (dd, <i>J</i> <sub>1</sub> = 15.0 Hz, <i>J</i> <sub>2</sub> = 7.8 Hz, 1H), 6.70 (d, <i>J</i> = 8.4 Hz, 2H), 7.02 (d, <i>J</i> = 8.4 Hz, 2H), 7.19 (d, <i>J</i> = 6.6 Hz, 3H), 7.24-7.27 (m, 5H), 7.34 (t, <i>J</i> = 7.5 Hz, 2H), 8.03 (d, <i>J</i> = 7.8 Hz, 1H), 8.08 (brs, 2H), 8.19 (t, <i>J</i> = 5.4 Hz, 2H), 8.52 (d, <i>J</i> = 6.0 Hz, 1H), 9.32 (s, 1H)                                                                                                                                                                    |
| 11       | 1.04 (d, <i>J</i> = 7.8 Hz, 3H), 1.52 (q, <i>J</i> = 12.0 Hz, 2H), 1.95 (d, <i>J</i> = 12.6 Hz, 2H), 2.07 (t, <i>J</i> = 7.2 Hz, 2H), 2.34-2.37 (m, 2H), 2.73(dd, <i>J</i> <sub>1</sub> = 13.5 Hz, <i>J</i> <sub>2</sub> = 9.9 Hz, 1H), 2.82-2.91 (m, 4H), 2.97 (dd, <i>J</i> <sub>1</sub> = 13.8 Hz, <i>J</i> <sub>2</sub> = 3.6 Hz, 2H), 3.10-3.16 (m, 2H), 3.20-3.23 (m, 2H), 3.55-3.59 (m, 1H), 3.71 (dd, <i>J</i> <sub>1</sub> = 16.8 Hz, <i>J</i> <sub>2</sub> = 5.4 Hz, 1H), 3.96 (m, 1H), 4.31 (m, 1H), 4.53-4.57 (m, 1H), 4.73 (m, 1H), 6.69 (d, <i>J</i> = 8.4 Hz, 2H), 7.01 (d, <i>J</i> = 7.8 Hz, 2H), 7.18-7.19 (m, 1H), 7.27 (m, 7H), 7.29 (d, <i>J</i> = 7.8 Hz, 2H), 7.32 (t, <i>J</i> = 7.2 Hz, 2H), 7.47 (t, <i>J</i> = 7.2 Hz, 1H), 7.53 (t, <i>J</i> = 7.5 Hz, 2H), 8.06 (m, 3H), 8.12 (t, <i>J</i> = 5.7 Hz, 1H), 8.48 (d, <i>J</i> = 7.2 Hz, 1H), 9.30 (brs, 1H), 9.79 (s, 1H), 10.00 (s, 1H) |
| 12       | 1.04 (d, <i>J</i> = 7.8 Hz, 3H), 1.59 (dd, <i>J</i> <sub>1</sub> = 12.0 Hz, <i>J</i> <sub>2</sub> = 5.4 Hz, 2H), 1.96 (d, <i>J</i> = 7.8 Hz, 2H), 2.33 (d, <i>J</i> = 6.6 Hz, 2H), 2.37-2.39 (m, 4H), 2.60 (m, 1H), 2.76 (dd, <i>J</i> <sub>1</sub> = 15.6 Hz, <i>J</i> <sub>2</sub> = 10.2 Hz, 1H), 2.83 (dd, <i>J</i> <sub>1</sub> = 13.8 Hz, <i>J</i> <sub>2</sub> = 7.8 Hz, 1H), 2.88 (dd, <i>J</i> <sub>1</sub> = 13.8 Hz, <i>J</i> <sub>2</sub> = 6.6 Hz, 1H), 2.96-3.08 (m, 6H), 3.70 -3.75 (m, 2H), 3.95-3.98 (m, 2H), 4.32 (m, 1H), 4.56-4.60 (m, 1H), 6.69 (d, <i>J</i> = 7.8 Hz, 2H), 7.01 (d, <i>J</i> = 8.4 Hz, 2H), 7.18-7.20 (m, 1H), 7.24-7.27 (m, 7H), 7.35 (t, <i>J</i> = 7.5 Hz, 2H), 7.99 (d, <i>J</i> = 7.2 Hz, 1H), 8.04 (brs, 4H), 8.08 (d, <i>J</i> = 9.0 Hz, 1H), 8.13 (t, <i>J</i> = 5.4 Hz, 1H), 8.48 (d, <i>J</i> = 7.8 Hz, 1H), 9.29 (s, 1H), 9.81 (s, 1H), 10.06 (s, 1H)              |
| 13       | 0.87 (t, <i>J</i> = 7.2 Hz, 3H), 0.97-1.14 (m, 5H), 1.76-1.82 (m, 4H), 2.60 (t, <i>J</i> = 12.3 Hz, 1H), 2.81-2.89 (m, 2H), 3.05 (t, <i>J</i> = 12.9 Hz, 1H), 3.77-3.96 (m, 4H), 4.34 (t, <i>J</i> = 7.2 Hz, 2H), 4.66 (t, <i>J</i> = 11.7 Hz, 1H) 6.68 (d, <i>J</i> = 8.4 Hz, 2H), 7.00 (d, <i>J</i> = 8.4 Hz, 2H), 7.18 (d, <i>J</i> = 7.2 Hz, 2H), 7.39-7.46 (m, 3H), 8.0-8.05 (m, 3H), 8.44 (t, <i>J</i> = 7.2 Hz, 1H), 9.61 (s, 1H)                                                                                                                                                                                                                                                                                                                                                                                                                                                                            |
| 14       | 0.86 (t, <i>J</i> = 7.8 Hz, 3H), 1.02 (dd, <i>J</i> <sub>1</sub> = 12.0 Hz, <i>J</i> <sub>2</sub> = 7.2 Hz, 3H), 1.53-1.80 (m, 4H), 2.68-2.98 (m, 6H), 3.57 (t, <i>J</i> = 5.4 Hz, 2H), 3.66 (t, <i>J</i> = 5.4 Hz, 2H), 3.79-3.89 (m, 1H), 3.98 (m, 1H), 4.28-4.33 (m, 2H), 4.54-4.62 (m, 1H), 4.83-4.91 (m, 1H) 6.70 (d, <i>J</i> = 7.8 Hz, 2H), 6.96-7.23(m, 9H), 7.39-7.43 (m, 1H), 7.48-7.51 (m, 2H), 8.07-8.10 (m, 3H), 8.23 (t, <i>J</i> = 5.7 Hz, 1H), 8.57 (d, <i>J</i> = 7.8 Hz, 1H), 9.34 (s, 1H)                                                                                                                                                                                                                                                                                                                                                                                                        |
| 15       | 0.82-0.88 (m, 6H), 0.93 (m, 1H), 1.10 (m, 1H), 1.75-1.81 (m, 4H), 2.15 (s, 6H), 2.19 (d, <i>J</i> = 13.2 Hz, 1H), 2.59(t, <i>J</i> = 6.3 Hz, 1H), 2.82 (dd, <i>J</i> <sub>1</sub> = 13.8 Hz, <i>J</i> <sub>2</sub> = 4.8 Hz, 1H), 2.97 (dd, <i>J</i> <sub>1</sub> = 15.0 Hz, <i>J</i> <sub>2</sub> = 2.4 Hz, 1H), 2.95-3.06 (m, 2H), 3.04 (t, <i>J</i> = 12.6 Hz, 1H), 3.75-3.85 (m, 3H), 4.27 (m, 1H), 4.33 (d, <i>J</i> = 12.6 Hz), 4.65 (t, <i>J</i> = 11.7 Hz, 1H), 6.39 (s, 2H), 7.17 (d, <i>J</i> = 7.2 Hz, 2H), 7.40-7.45 (m, 3H), 7.90 (t, <i>J</i> = 5.4 Hz, 1 H), 7.99 (dd, <i>J</i> <sub>1</sub> = 11.4 Hz, <i>J</i> <sub>2</sub> = 3.0 Hz, 1H), 8.26 (s, 2H)                                                                                                                                                                                                                                            |
| 16       | 0.68-1.05 (m, 9H), 1.48-1.80 (m, 4H), 2.12-2.16(m, 6H), 2.65-2.69(m, 1H), 2.81-2.84 (m, 3H), 2.89-3.01 (m, 2H), 3.49-3.66 (m, 2H), 3.73-3.87 (m, 2H), 4.21-4.32 (m, 2H), 4.61-4.87 (m, 1H), 4.79-4.89 (m, 1H) 6.40 (s, 2H), 6.94-6.98 (m, 3H), 7.09-                                                                                                                                                                                                                                                                                                                                                                                                                                                                                                                                                                                                                                                                |

|    |                                                                                                                                                                                                                                                                                                                                                                                                                                                                                                                                                                                                                                                                                                                                                                                                                                                                     |
|----|---------------------------------------------------------------------------------------------------------------------------------------------------------------------------------------------------------------------------------------------------------------------------------------------------------------------------------------------------------------------------------------------------------------------------------------------------------------------------------------------------------------------------------------------------------------------------------------------------------------------------------------------------------------------------------------------------------------------------------------------------------------------------------------------------------------------------------------------------------------------|
|    | 7.23 (m, 4H), 7.38-7.51 (m, 3H), 8.00-8.07 (m, 3H), 8.23 (d, $J = 10.8$ Hz, 2H), 9.02 (s, 1H)                                                                                                                                                                                                                                                                                                                                                                                                                                                                                                                                                                                                                                                                                                                                                                       |
| 17 | 0.87 (t, $J = 7.2$ Hz, 3H), 0.96 (m, 1H), 1.04 (d, $J = 7.2$ Hz, 3H), 1.11 (m, 1H), 1.74-1.81 (m, 4H), 2.26 (m, 2H), 2.45-2.56 (m, 3H), 2.75 (dd, $J_1 = 13.8$ Hz, $J_2 = 10.2$ Hz, 1H), 2.83 (dd, $J_1 = 13.8$ Hz, $J_2 = 7.2$ Hz, 1H), 2.89 (dd, $J_1 = 13.8$ Hz, $J_2 = 6.6$ Hz, 1H), 2.99 (dd, $J_1 = 13.8$ Hz, $J_2 = 3.0$ Hz, 1H), 3.05 (t, $J = 12.9$ Hz, 1H), 3.57 (dd, $J_1 = 16.8$ Hz, $J_2 = 5.4$ Hz, 1H), 3.70 (dd, $J_1 = 16.8$ Hz, $J_2 = 6.0$ Hz, 1H), 3.86 (d, $J = 12.6$ Hz, 1H), 3.96-3.98 (m, 1H), 3.96 (q, $J = 6$ Hz, 1H), 4.31 (m, 1H), 4.38 (d, $J = 12$ Hz, 1H), 4.54-4.58 (m, 1H), 4.65 (m, 1H), 6.69 (d, $J = 6.6$ Hz, 2H), 7.01 (d, $J = 6.6$ Hz, 2H), 7.19 (d, $J = 6.0$ Hz, 3H), 7.23 (m, 4H), 7.39-7.44 (m, 3H), 8.02-8.04 (m, 3H), 8.13 (t, $J = 5.4$ Hz, 1H), 8.50 (d, $J = 7.2$ Hz, 1H), 9.30 (s, 1H), 9.77 (s, 1H), 10.02 (s, 1H) |
